# Supplementary material for: Autophagy and autophagy dysfunction contribute to apoptosis in HepG2 cells exposed to nanosilica
Source: Royal Society of Chemistry journal article supplement (doi:10.1039/c5tx00465a), 2016-01-01
Supplement: c5tx00465a1.pdf [file c5tx00465a1.pdf]

### Supplementary Figure 1

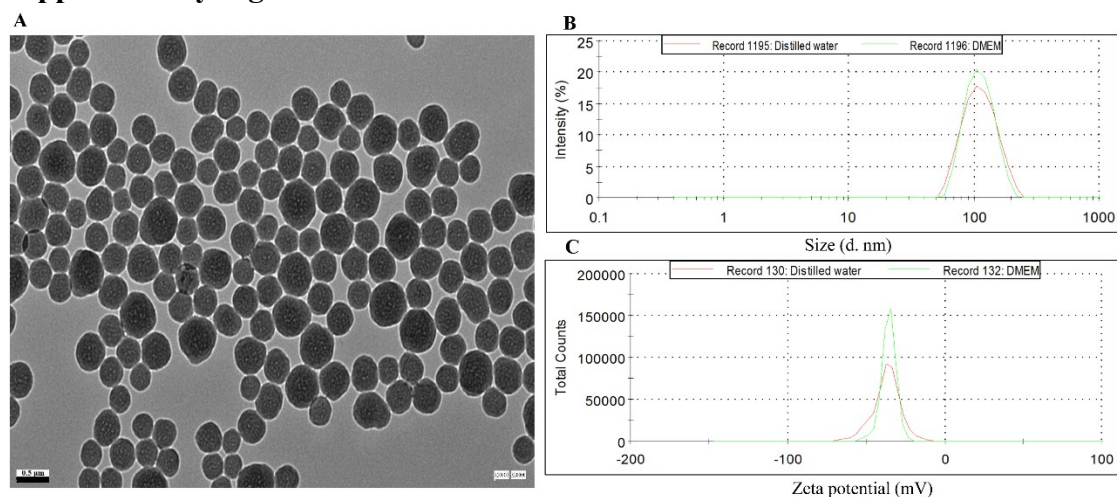

**Supplementary Figure 1.** Characterization of nanosilica. (A) The particles in TEM image appeared spherical and well dispersed with an average diameter 62 nm. (B) The hydrodynamic sizes and (C) zeta potential of nanosilica in both distilled water and serum-free DMEM. (Scale bar: 0.5 μm).
